# Supplementary material for: Band edge tuned ZnxCd1−xS solid solution nanopowders for efficient solar photocatalysis
Source: Royal Society of Chemistry journal article supplement (doi:10.1039/c7cp06305a), 2017-01-01
Supplement: c7cp06305a1.pdf [file c7cp06305a1.pdf]

**Electronic Supplementary Information**

**Band Edge Tuned  $Zn_xCd_{1-x}S$  Solid Solution Nanopowders for Efficient  
Solar Photocatalysis**

Shrabani Ghosh<sup>a</sup>, Samrat Sarkar<sup>a</sup>, Bikram Kumar Das<sup>b</sup>, Dipayan Sen<sup>b</sup>, Madhupriya Samanta<sup>a</sup>,  
Kalyan Kumar Chattopadhyay<sup>a,b,\*</sup>

<sup>a</sup>School of Materials Science and Nanotechnology, Jadavpur University, Kolkata 700032,  
India

<sup>b</sup>Thinfilm and NanoScience Laboratory, Department of Physics, Jadavpur University,  
Kolkata 700032, India

\*Corresponding Author's e-mail: [kalyan\\_chattopadhyay@yahoo.com](mailto:kalyan_chattopadhyay@yahoo.com)

Tel.: +91 9433389445; Fax: +91 33 2414 6007

**Table S1:** Previous Literature Survey

| Highest performance in terms of photocatalyst | Synthesis                  | Crystal Phase | Particle Size | Visible-light photocatalytic activity |        | Ref |
|-----------------------------------------------|----------------------------|---------------|---------------|---------------------------------------|--------|-----|
|                                               |                            |               |               | Dye                                   | Time   |     |
| <b>Zn<sub>0.21</sub>Cd<sub>0.79</sub>S</b>    | Supercritical solvothermal | Wurtzite      | 9.5           | RhB                                   | 2 h    | 10  |
| <b>Cd<sub>0.8</sub>Zn<sub>0.2</sub>S</b>      | Facile self-assembly route | Wurtzite      | 85±15         | RhB                                   | 20 min | 15  |
| <b>Cd : Zn = 3:1</b>                          | Hydrothermal               | Wurtzite      | 15            | MO                                    | 5 h    | 18  |
| <b>Zn<sub>0.28</sub>Cd<sub>0.72</sub>S</b>    | Microwave Synthesis        | Wurtzite      | 10            | MO                                    | 6 h    | 30  |
| <b>Zn<sub>0.2</sub>Cd<sub>0.8</sub>S</b>      | Solvothermal               | Hexagonal     | -             | MB                                    | 1 h    | 31  |

**Table S2:** EDS of Zn<sub>x</sub>Cd<sub>1-x</sub>S

| <b>x</b>    | <b>0.0</b> | <b>0.2</b> | <b>0.4</b> | <b>0.6</b> | <b>0.8</b> | <b>1.0</b> |
|-------------|------------|------------|------------|------------|------------|------------|
| Zn (atom %) | 0.00       | 11.52      | 18.32      | 29.18      | 37.97      | 49.61      |
| Cd (atom %) | 49.73      | 37.26      | 32.33      | 19.01      | 9.73       | 0.00       |
| S (atom %)  | 50.27      | 51.22      | 49.45      | 51.81      | 52.31      | 50.39      |

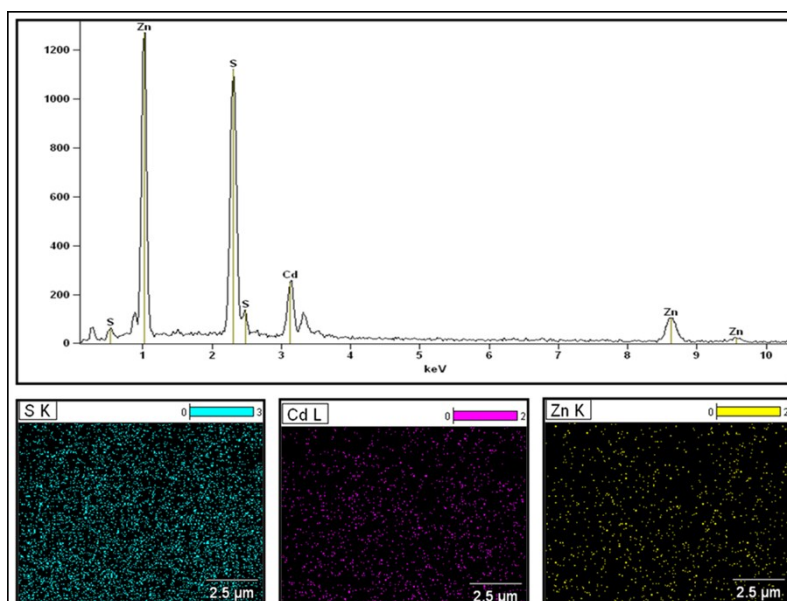

**Figure S1:** EDS composition analysis and elemental distribution of  $\text{Zn}_{0.8}\text{Cd}_{0.2}\text{S}$ .

The EDS analysis gives knowledge about the compositional percentage of Zinc Cadmium Sulfide in Table S1. It determines that atom percentage for  $\text{Zn}_x\text{Cd}_{1-x}\text{S}$  is almost similar to the desired value of  $x$ . EDS spectra and elemental mapping of composition  $x=0.8$  is displayed in Figure S1.

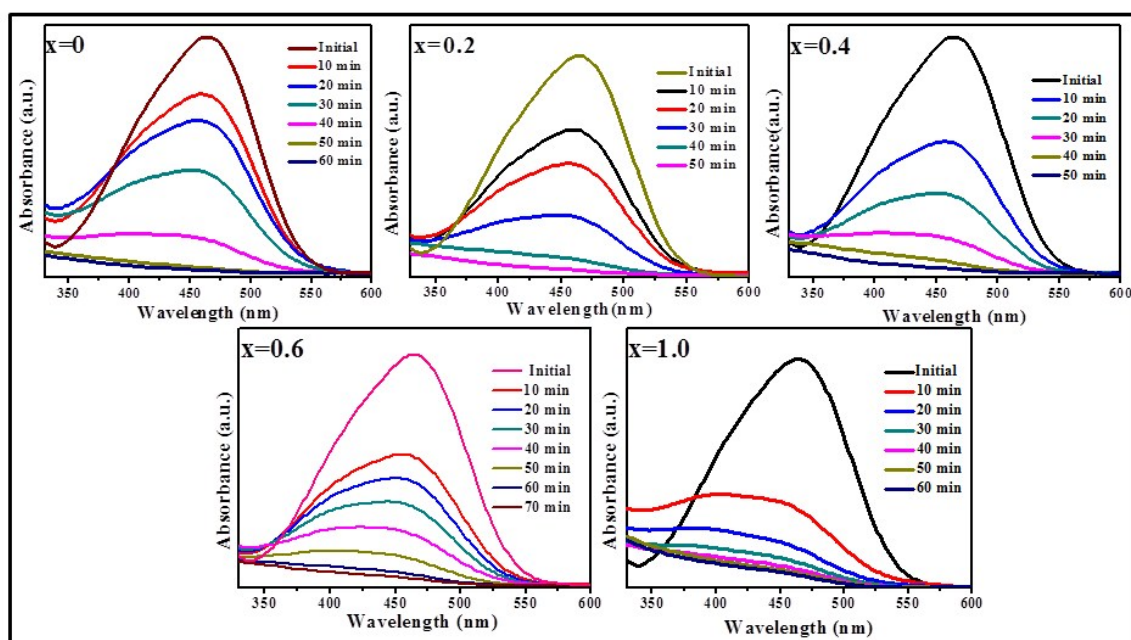

**Figure S2:** Absorbance Spectra of MO in presence of  $\text{Zn}_x\text{Cd}_{1-x}\text{S}$  for different composition( $x$ ) under sunlight irradiation.

The degradation profile of Methyl Orange in presence of catalyst  $Zn_xCd_{1-x}S$  for different  $x$  value under sunlight irradiation is shown in Figure S2. It confirms about the fast dye degradation as well as catalytic activity of these sulfide materials. All samples are good catalysts and it degrades the dye by almost above 90 % within 1 h under natural sunlight. The rate of degradation is also noticeable for all the samples.
